# Supplementary material
Source: PubMed Central journal article supplement (PMC7751625)
Supplement: NIHMS1651158-supplement-supporting_figure.pdf [file NIHMS1651158-supplement-supporting_figure.pdf]

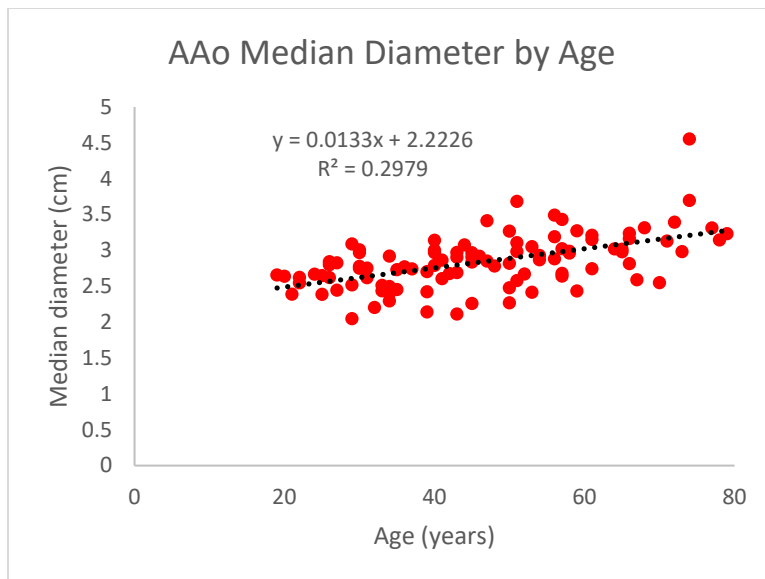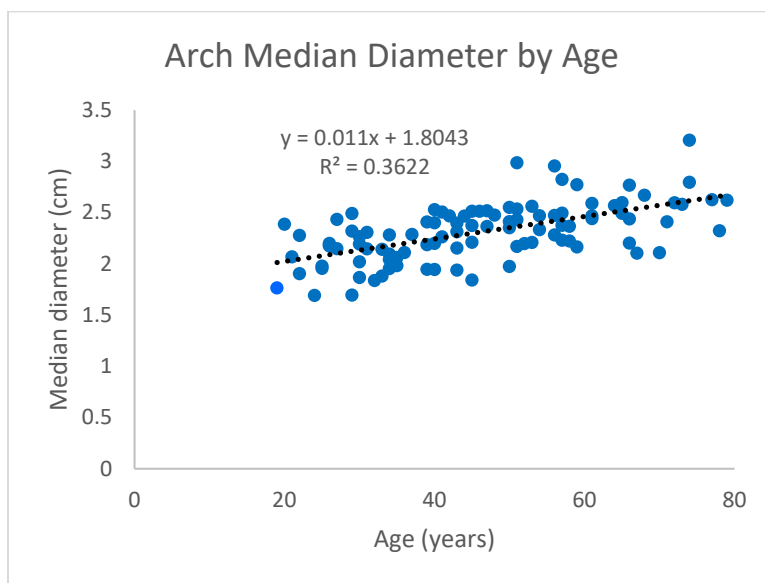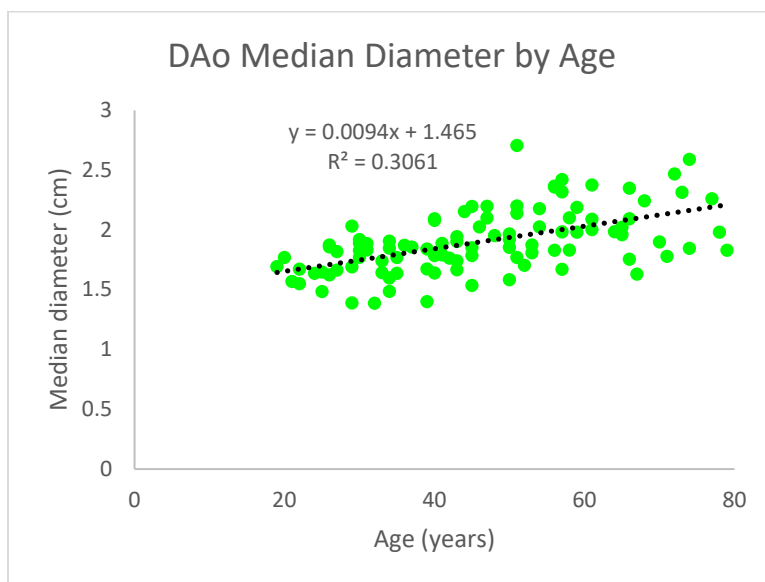

*Supporting Information Figure S1: Mean diameter for each of N=100 subjects by aorta region. Trendlines and their equations are also shown, revealing an increase in aorta size by 0.9-1.3 mm/decade in the thoracic aorta.*
